# Supplementary material for: Long-term survival and toxicity outcomes of intensity modulated radiation therapy for the treatment of esophageal cancer: A large single-institutional cohort study
Source: PubMed Central journal article supplement — Adv Radiat Oncol. 2017 Apr 19;2(3):316–24. doi: 10.1016/j.adro.2017.04.002 (PMC5605282; doi:10.1016/j.adro.2017.04.002), 2017-04-19
Supplement: mmc1.pdf [file mmc1.pdf]

## Supplementary Tables

**SUPPLEMENTARY TABLE 1.** Univariate and Multivariate Analysis for All-Cause Mortality in Surgical Patients

| Variable                                               | Univariate      | Multivariate          |                 |
|--------------------------------------------------------|-----------------|-----------------------|-----------------|
|                                                        | <i>P</i> -value | Hazard ratio (95% CI) | <i>P</i> -value |
| Age (continuous)                                       | 0.615           |                       |                 |
| Sex (male vs. female)                                  | 0.289           |                       |                 |
| Race (caucasian vs. others)                            | 0.422           |                       |                 |
| ECOG performance status (0 vs. 1–2)                    | 0.779           |                       |                 |
| Histology (squamous cell carcinoma vs. adenocarcinoma) | 0.797           |                       |                 |
| Histologic grade (G3 vs. Gx/G1/G2)                     | <0.001          | 2.36 (1.60-3.48)      | <0.001          |
| Tumor location (distal/GEJ vs. upper/middle)           | 0.215           |                       |                 |
| Primary tumor length (continuous)                      | 0.083           |                       |                 |
| Clinical T stage (T1b-2 vs. T3-4)                      | 0.372           |                       |                 |
| Clinical N stage (N0 vs. N+)                           | 0.084           |                       |                 |
| Induction chemotherapy (yes vs. no)                    | 0.903           |                       |                 |
| Baseline PET SUVmax (continuous)                       | 0.392           |                       |                 |
| Total radiation dose (50.4 Gy vs >50.4 Gy)             | 0.151           |                       |                 |
| Chemotherapy groups (Platinum/5FU vs. Taxane/5FU)      | 0.853           |                       |                 |
| Chemotherapy groups (Carbo/Paclitaxel vs. Taxane/5FU)  | 0.951           |                       |                 |
| Chemotherapy groups (Doce/5FU/Platinum vs. Taxane/5FU) | 0.326           |                       |                 |
| Chemotherapy groups (Other/Unk vs. Taxane/5FU)         | 0.950           |                       |                 |

Abbreviations: ECOG, Eastern Cooperative Oncology Group; GEJ, gastroesophageal junction; PET, position emission tomography; SUV, standard uptake value.

Taxane=Docetaxel, Paclitaxel; 5FU=continuous infusion 5FU or Xeloda; Platinum=carboplatin, cisplatin or oxaliplatin; Carbo=Carboplatin; Doce=Docetaxel; Other=Irinotecan-based, cetuximab, experimental agents; Unk=unknown

**SUPPLEMENTARY TABLE 2.** Univariate and Multivariate Analysis for All-Cause Mortality in Non-Surgical Patients

| Variable                                               | Univariate      | Multivariate          |                 |
|--------------------------------------------------------|-----------------|-----------------------|-----------------|
|                                                        | <i>P</i> -value | Hazard ratio (95% CI) | <i>P</i> -value |
| Age (continuous)                                       | 0.623           |                       |                 |
| Sex (male vs. female)                                  | 0.041           |                       |                 |
| Race (caucasian vs. others)                            | 0.542           |                       |                 |
| ECOG performance status (0 vs. 1–2)                    | 0.557           |                       |                 |
| Histology (squamous cell carcinoma vs. adenocarcinoma) | 0.172           |                       |                 |
| Histologic grade (G3 vs. Gx/G1/G2)                     | 0.581           |                       |                 |
| Tumor location (distal/GEJ vs. upper/middle)           | 0.071           | 1.43 (1.05-1.96)      | 0.025           |
| Primary tumor length (continuous)                      | 0.009           |                       |                 |
| Clinical T stage (T1b-2 vs. T3-4)                      | 0.033           |                       |                 |
| Clinical N stage (N+ vs. N0)                           | <0.001          | 2.09 (1.48-2.94)      | <0.001          |
| Induction chemotherapy (yes vs. no)                    | 0.903           |                       |                 |
| Baseline PET SUVmax (continuous)                       | <0.001          | 1.07 (1.03-1.11)      | 0.001           |
| Total radiation dose (50.4 Gy vs >50.4 Gy)             | 0.097           |                       |                 |
| Chemotherapy groups (Platinum/5FU vs. Taxane/5FU)      | 0.378           |                       |                 |
| Chemotherapy groups (Carbo/Paclitaxel vs. Taxane/5FU)  | 0.884           |                       |                 |
| Chemotherapy groups (Doce/5FU/Platinum vs. Taxane/5FU) | 0.131           |                       |                 |
| Chemotherapy groups (Other/Unk vs. Taxane/5FU)         | 0.451           |                       |                 |

Abbreviations: ECOG, Eastern Cooperative Oncology Group; GEJ, gastroesophageal junction; PET, position emission tomography; SUV, standard uptake value.

Taxane=Docetaxel, Paclitaxel; 5FU=continuous infusion 5FU or Xeloda; Platinum=carboplatin, cisplatin or oxaliplatin; Carbo=Carboplatin; Doce=Docetaxel; Other=Irinotecan-based, cetuximab, experimental agents; Unk=unknown

**SUPPLEMENTARY TABLE 3.** Chi-Square analysis of the relationship of chemotherapy type and toxicities

|                             | <b>N</b> | <b>Gr 0-2</b> | <b>Gr 3-4</b> | <b>Chi-square<br/>p-value</b> |
|-----------------------------|----------|---------------|---------------|-------------------------------|
| <b>Dysphagia Toxicity</b>   |          |               |               |                               |
| Taxane/5FU                  | 303      | 271           | 32            | 0.135                         |
| Platinum/5FU                | 196      | 186           | 10            |                               |
| Carbo/Paclitaxel            | 14       | 14            | 0             |                               |
| Doce/5FU/Platinum           | 24       | 23            | 1             |                               |
| Other/Unk                   | 50       | 47            | 3             |                               |
| <b>Esophagitis Toxicity</b> |          |               |               |                               |
| Taxane/5FU                  | 303      | 251           | 52            | 0.015                         |
| Platinum/5FU                | 196      | 179           | 17            |                               |
| Carbo/Paclitaxel            | 14       | 13            | 1             |                               |
| Doce/5FU/Platinum           | 24       | 23            | 1             |                               |
| Other/Unk                   | 50       | 47            | 3             |                               |
| <b>Pneumonitis Toxicity</b> |          |               |               |                               |
| Taxane/5FU                  | 303      | 296           | 7             | 0.367                         |
| Platinum/5FU                | 196      | 195           | 1             |                               |
| Carbo/Paclitaxel            | 14       | 14            | 0             |                               |
| Doce/5FU/Platinum           | 24       | 24            | 0             |                               |
| Other/Unk                   | 50       | 50            | 0             |                               |
| <b>Cardiac Toxicity*</b>    |          |               |               |                               |
| Taxane/5FU                  | 303      | 299           | 4             | 0.413                         |
| Platinum/5FU                | 196      | 190           | 6             |                               |
| Carbo/Paclitaxel            | 14       | 14            | 0             |                               |
| Doce/5FU/Platinum           | 24       | 24            | 0             |                               |
| Other/Unk                   | 50       | 50            | 0             |                               |

Taxane=Docetaxel, Paclitaxel; 5FU=continuous infusion 5FU or Xeloda; Platinum=carboplatin, cisplatin or oxaliplatin; Carbo=Carboplatin; Doce=Docetaxel; Other=Irinotecan-based, cetuximab, experimental agents; Unk=unknown

\* such as atrial fibrillation or heart failure

**SUPPLEMENTARY TABLE 4.** Univariate and Multivariate Analysis for Predictors of Grade 3-4 Esophagitis

| Variable                                               | Univariate      | Multivariate          |                 |
|--------------------------------------------------------|-----------------|-----------------------|-----------------|
|                                                        | <i>P</i> -value | Hazard ratio (95% CI) | <i>P</i> -value |
| Age (continuous)                                       | 0.811           |                       |                 |
| Sex (male vs. female)                                  | 0.326           |                       |                 |
| Race (caucasian vs. others)                            | 0.584           |                       |                 |
| ECOG performance status (0 vs. 1-2)                    | 0.150           |                       |                 |
| Histology (squamous cell carcinoma vs. adenocarcinoma) | 0.009           | 2.23 (1.26-3.95)      | 0.006           |
| Histologic grade (G3 vs. Gx/G1/G2)                     | 0.692           |                       |                 |
| Tumor location (distal/GEJ vs. upper/middle)           | 0.135           |                       |                 |
| Primary tumor length (continuous)                      | 0.243           |                       |                 |
| Clinical T stage (T1b-2 vs. T3-4)                      | 0.774           |                       |                 |
| Clinical N stage (N0 vs. N+)                           | 0.024           | 1.85 (1.03-3.32)      | 0.04            |
| Induction chemotherapy (yes vs. no)                    | 0.132           |                       |                 |
| Baseline PET SUVmax (continuous)                       | 0.847           |                       |                 |
| Total radiation dose (50.4 Gy vs >50.4 Gy)             | 0.379           |                       |                 |
| Chemotherapy groups (Platinum/5FU vs. Taxane/5FU)      | 0.008           | 0.45 (0.25-0.80)      | 0.007           |
| Chemotherapy groups (Carbo/Paclitaxel vs. Taxane/5FU)  | 0.345           |                       |                 |
| Chemotherapy groups (Doce/5FU/Platinum vs. Taxane/5FU) | 0.131           |                       |                 |
| Chemotherapy groups (Other/Unk vs. Taxane/5FU)         | 0.005           |                       |                 |

Abbreviations: ECOG, Eastern Cooperative Oncology Group; GEJ, gastroesophageal junction; PET, position emission tomography; SUV, standard uptake value.

Taxane=Docetaxel, Paclitaxel; 5FU=continuous infusion 5FU or Xeloda; Platinum=carboplatin, cisplatin or oxaliplatin; Carbo=Carboplatin; Doce=Docetaxel; Other=Irinotecan-based, cetuximab, experimental agents; Unk=unknown

**SUPPLEMENTARY TABLE 5. Comparison clinical characteristics and pathology results of the present study with CROSS**

| <b>Characteristic</b>               |                          | <b>Present study</b> | <b>%</b> | <b>CROSS</b> | <b>%*</b> | $\chi^2$ ( <i>P-value</i> ) |
|-------------------------------------|--------------------------|----------------------|----------|--------------|-----------|-----------------------------|
| <b>Age (y)</b>                      |                          |                      |          |              |           | ---                         |
|                                     | Median                   | 60                   |          | 60           |           |                             |
|                                     | Range                    | 21-83                |          | 36-79        |           |                             |
| <b>Sex</b>                          |                          |                      |          |              |           | 0.000                       |
|                                     | Male                     | 244                  | 87.8     | 134          | 75        |                             |
|                                     | Female                   | 34                   | 12.2     | 44           | 25        |                             |
| <b>Tumor histology</b>              |                          |                      |          |              |           | 0.000                       |
|                                     | Adeno                    | 249                  | 89.6     | 134          | 75        |                             |
|                                     | Squamous                 | 16                   | 5.8      | 41           | 23        |                             |
|                                     | Other                    | 13                   | 4.6      | 3            | 2         |                             |
| <b>Tumor Length(cm)</b>             |                          |                      |          |              |           | ---                         |
|                                     | Median                   | 5                    |          | 4            |           |                             |
|                                     | Interquartile            | 3-7                  |          | 3-6          |           |                             |
| <b>Tumor location</b>               |                          |                      |          |              |           | 0.000                       |
|                                     | Proximal third           | 1                    | 0.4      | 4            | 2         |                             |
|                                     | Middle third             | 8                    | 2.9      | 25           | 14        |                             |
|                                     | Distal third             | 155                  | 55.7     | 104          | 58        |                             |
|                                     | Esophagogastric junction | 114                  | 41.0     | 39           | 22        |                             |
|                                     | Missing data             | 0                    | 0        | 3            | 3         |                             |
| <b>Clinical T stage<sup>†</sup></b> |                          |                      |          |              |           | 0.365                       |
|                                     | cT1                      | 1                    | 0.4      | 1            | 1         |                             |
|                                     | cT2                      | 34                   | 12.2     | 26           | 15        |                             |
|                                     | cT3                      | 238                  | 85.6     | 150          | 84        |                             |
|                                     | cT4                      | 4                    | 1.4      | 0            | 0         |                             |
|                                     | Could not be determined  | 1                    | 0.4      | 1            | 1         |                             |
| <b>Clinical N stage<sup>†</sup></b> |                          |                      |          |              |           | 0.537                       |
|                                     | N0                       | 101                  | 36.3     | 59           | 33        |                             |
|                                     | N1                       | 176                  | 63.3     | 116          | 65        |                             |
|                                     | Could not be determined  | 1                    | 0.4      | 3            | 2         |                             |
| <b>Karnofsky Performance Status</b> |                          |                      |          |              |           | 0.000                       |
|                                     | 100                      | 25                   | 9.0      | 144          | 81        |                             |
|                                     | 80-90                    | 244                  | 87.8     | 34           | 19        |                             |
|                                     | 70                       | 9                    | 3.2      | 0            | 0         |                             |
| <b>pT-stage<sup>§</sup></b>         |                          |                      |          |              |           | 0.001                       |
|                                     | pTis                     | 0                    | 0        | 1            | 1         |                             |
|                                     | pT0                      | 74                   | 26.6     | 62           | 39        |                             |
|                                     | pT1                      | 47                   | 16.9     | 15           | 10        |                             |
|                                     | pT2                      | 31                   | 11.2     | 32           | 20        |                             |
|                                     | pT3                      | 122                  | 43.9     | 49           | 30        |                             |
|                                     | pT4                      | 4                    | 1.4      | 1            | 1         |                             |
|                                     | Unknown                  | 0                    | 0        | 1            | 1         |                             |
| <b>pN-stage<sup>§</sup></b>         |                          |                      |          |              |           | 0.442                       |
|                                     | pN0                      | 182                  | 65.4     | 111          | 69        |                             |

|                                            |           |      |          |    |       |
|--------------------------------------------|-----------|------|----------|----|-------|
| pN1                                        | 96        | 34.6 | 50       | 31 |       |
| No. of LNs resected-Median (p25-p75)       | 20(14-26) |      | 15(9-21) |    | ---   |
| No. of positive LNs-Median (p25-p75)       | 0(0-1)    |      | 0(0-1)   |    |       |
| <b>Radicality of resection<sup>#</sup></b> |           |      |          |    | 0.141 |
| R0 resection                               | 265       | 95.3 | 148      | 92 |       |
| R1 resection                               | 13        | 4.7  | 13       | 8  |       |
| <b>Tumor regression grade</b>              |           |      |          |    | 0.046 |
| Grade 1                                    | 73        | 26.3 | 47       | 29 |       |
| Grade 2                                    | 82        | 29.5 | 52       | 32 |       |
| Grade 3                                    | 86        | 30.9 | 32       | 20 |       |
| Grade 4                                    | 32        | 11.5 | 29       | 18 |       |
| Missing                                    | 5         | 1.8  | 1        | 1  |       |

Abbreviations: \* Percentages may not total 100 because of rounding; LNs= Lymph Nodes; p25-p75: interquartile range; <sup>§</sup>pT and pN-stage according to the sixth edition of AJCC TNM-classification; <sup>#</sup>R0-resection was defined as no vital tumor cells within 1 mm of all resection margins. Tumor regression grade was defined as: Grade 1: no evidence of vital residual tumor cells in both primary tumor and resected lymph nodes. Grade 2: pT0N1 or >0% but <10% vital residual tumor cells in the primary tumor, Grade 3: 10-50% vital residual tumor cells in the primary tumor, Grade 4: >50% vital residual tumor cells in the primary tumor

**SUPPLEMENTARY TABLE 6.** Studies comparing IMRT and 3D-CRT for esophageal cancer.

| Study          | Details                      | IMRT           | 3D-CRT         | p value |
|----------------|------------------------------|----------------|----------------|---------|
| Freilich J (9) | No. of patients              | 138            | 94             |         |
|                | Radiation dose               | Varies         | Varies         | -       |
|                | Median survival              | 32 months      | 29 months      | 0.74    |
|                | Median relapse free survival | 25 months      | 20 months      | 0.66    |
|                | Grade $\geq 3$ toxicity (%)  | 24.6           | 37.2           | 0.04    |
|                | Hospitalization (%)          | 26.7           | 31.9           | 0.17    |
|                | Feeding tube (%)             | 9.5            | 8.5            | 0.83    |
|                | Mean weight loss SD (%)      | 9 (7.4)        | 6.1 (4.3)      | 0.012   |
| Lin SH (16)    | No. of patients              | 263            | 413            |         |
|                | Radiation dose               | 50.4Gy/28f     | 50.4Gy/28f     | -       |
|                | 5-yr survival                | 44%            | 34%            | <0.01   |
|                | Median survival              | 43.2 months    | 25.2 months    | <0.01   |
|                | Cancer-specific deaths       | N*             | N*             | 0.86    |
|                | Pulmonary deaths             | N*             | N*             | 0.39    |
|                | Cardiac related deaths       | N*             | N*             | 0.049   |
| Lin XD (18)    | No. of patients              | 30             | 30             |         |
|                | Radiation dose               | 60Gy/30f       | 60Gy/30f       | -       |
|                | 3-yr survival                | 66.7           | 63.3           | >0.05   |
|                | Lung V20                     | 21.2 $\pm$ 5.1 | 24.9 $\pm$ 5.9 | <0.05   |
|                | Lung V30                     | 15.3 $\pm$ 3.8 | 17.5 $\pm$ 3.9 | <0.05   |
|                | Grade 3+4 esophagitis        | 10.0%          | 6.7%           | >0.05   |
|                | Grade 3+4 pneumonitis        | 0.0%           | 3.3%           | >0.05   |

\* The details were not shown in the text.
